# Supplementary material
Source: MDPI journal article supplement (https://www.mdpi.com/2075-5309/14/3/753)
Supplement: s1 [file s1]

## Supplementary Materials

### Supplementary Materials 1

#### Questionnaire S1.Daytime lightscape walking survey in Campus A of Chongqing University

Hello, dear friends!

First of all, thank you for your participation in this lightscape walking in the old campus of Chongqing University. Please follow the route to experience the light walk under the guidance of the tour leader, and read and complete the questionnaire carefully. When you are walking in the old campus of Chongqing University, please carefully observe and pay attention to the surrounding light sources, light and shadow and their changes to form a strong visual impression, and fill in the questionnaire when you arrive at the designated area. This questionnaire is for area A, which is close to the Jialing River and has a different experience of light and humanity.

#### Basic Information

1. Your name \* [fill in the blank] \* \_\_\_\_\_
2. Your gender [Single choice question]\*  
☐ Male  
☐ Female
3. Your age \* [fill in the blank] \* \_\_\_\_\_
4. Your occupation or profession\* [fill in the blank] \* \_\_\_\_\_

#### Subjective evaluation

1. Your lightscape spot (either one will do) [Single Choice] \*

|                                                                                                                                  |                                                                                                                                         |                                                                                                                                     |                                                                                                                                      |                                                                                                                                                 |
|----------------------------------------------------------------------------------------------------------------------------------|-----------------------------------------------------------------------------------------------------------------------------------------|-------------------------------------------------------------------------------------------------------------------------------------|--------------------------------------------------------------------------------------------------------------------------------------|-------------------------------------------------------------------------------------------------------------------------------------------------|
| <br><input type="radio"/> A1 (ab passage)     | <br><input type="radio"/> A2 (five churches)         | <br><input type="radio"/> A3 (bell tower)        | <br><input type="radio"/> A4 (library)           | <br><input type="radio"/> A5 (plaza outside the dormitory) |
| <br><input type="radio"/> A6 (Democracy Lake) | <br><input type="radio"/> A7 (Public Administration) | <br><input type="radio"/> A8 (Bishop's Building) | <br><input type="radio"/> A9 (Literature Lounge) | <br><input type="radio"/> A10 (College of Engineering)     |

2. Please read the following adjectives carefully; to what extent do they, in fact, reflect your feelings about the overall experience of lightscapes at this test site? \* [matrix scale Question]

| Evaluation Dimensions              | Semantic Terms               | 2                      | 1                 | 0               | -1                   | -2                        |
|------------------------------------|------------------------------|------------------------|-------------------|-----------------|----------------------|---------------------------|
|                                    |                              | (e.g., Very Satisfied) | (e.g., Satisfied) | (e.g., Neutral) | (e.g., Dissatisfied) | (e.g., Very Dissatisfied) |
| 01 Quality of emotional perception | Satisfactory—Dissatisfactory |                        |                   |                 |                      |                           |
|                                    | Comfortable—Uncomfortable    |                        |                   |                 |                      |                           |
|                                    | Pleasant—Worried             |                        |                   |                 |                      |                           |
|                                    | Vibrant—Dull                 |                        |                   |                 |                      |                           |
|                                    | Interesting—Boring           |                        |                   |                 |                      |                           |
|                                    | Impressed—Unimpressed        |                        |                   |                 |                      |                           |
|                                    | Satisfactory—Questionable    |                        |                   |                 |                      |                           |
|                                    | Bright—Dark                  |                        |                   |                 |                      |                           |

|                      |                                                   |
|----------------------|---------------------------------------------------|
|                      | Blinding—Appropriate                              |
|                      | Uniformity—unevenness                             |
|                      | Direct—Indirect                                   |
|                      | Warm—cool                                         |
| 02 lightscares       | Richness—homogeneity                              |
| Characteristic       | Dynamic—static                                    |
| Perception           | Strongly rhythmic—weakly rhythmic                 |
|                      | Cultural connotations—no cultural connotations    |
|                      | Visible change—insignificant change               |
|                      | Aesthetically pleasing—not aesthetically pleasing |
| 03 Ambient Spatial   | Coherent—disordered                               |
| Atmosphere           | Orderly—disorderly                                |
|                      | Natural—artificial                                |
|                      | Traditional—Modern                                |
|                      | Visible change—insignificant change               |
| 04 Social Tendencies | Social—Unsocial                                   |
|                      | Safe—Unsafe                                       |

---

3. Looking closely at the area, are there any lightscares that give you a pleasant, cosy or pleasing experience? Please select and rank 5 lightscares that are pleasant to you. [For the ranking question, please put the numbers in parentheses in order] \*

- ☐ the light of the sky and the shadows of the clouds
- ☐ Shadows of Buildings
- ☐ Sunset
- ☐ Plant Silhouette Skyline
- ☐ Building Silhouette Skyline
- ☐ Light Spots Between Leaves
- ☐ Lake Reflection
- ☐ Reflections of Building Roofs, Facades and Glasses
- ☐ Reflections of special materials such as the ground
- ☐ Shadow fall on mountain rock staircase
- ☐ Others

4. Looking closely at the area, are there any lightscares that give you an unpleasant, uncomfortable or upsetting experience? Please select and rank 5 lightscares that are unpleasant for you. [For ranking questions, please put the numbers in brackets]\*

- ☐ the light of the sky and the shadows of the clouds
- ☐ Shadows of Buildings
- ☐ Sunset
- ☐ Plant Silhouette Skyline
- ☐ Building Silhouette Skyline
- ☐ Light Spots Between Leaves
- ☐ Lake Reflection
- ☐ Reflections of Building Roofs, Facades and Glasses
- ☐ Reflections of special materials such as the ground
- ☐ Shadow fall on mountain rock staircase
- ☐ Others

5. To what extent do other environmental factors in the area influence your experience? (Please choose which value best indicates the extent to which it has influenced your experience?) [Matrix Scale Question] \*

|                                                         | Very High<br>Impact<br>2 | Impact<br>1 | Fair<br>0 | No Impact<br>-1 | Very Low<br>Impact<br>-2 |
|---------------------------------------------------------|--------------------------|-------------|-----------|-----------------|--------------------------|
| 1. Temperature and humidity environment                 |                          |             |           |                 |                          |
| 2. Acoustic environment                                 |                          |             |           |                 |                          |
| 3. Odour quality                                        |                          |             |           |                 |                          |
| 4. Outdoor space scale and division method              |                          |             |           |                 |                          |
| 5. Landscape arrangement such as greening and sketches. |                          |             |           |                 |                          |
| 6. Arrangement of service facilities                    |                          |             |           |                 |                          |

6. For sound (hearing), odour (taste, smell), material (touch), etc., can you specify what factors you perceive (e.g., the scent of flowers, birdsong, etc.), which have an impact on the perception of light? Please fill in the blanks after the options and write down your perception factors and perception situation. [Multiple Choice Questions] \*

- ☐ Hearing \_\_\_\_\_ \*
- ☐ Taste \_\_\_\_\_ \*
- ☐ Smell \_\_\_\_\_ \*
- ☐ Tactile \_\_\_\_\_ \*
- ☐ No effect

7. Do you have any other optimisation suggestions for the creation of this lightscape spot? Please give 1-2 optimisation suggestions for our later improvement. [Fill in the blank]  
\*

### *Supplementary Materials 2*

#### **Questionnaire S2.** Daytime lightscape walking survey in Campus B of Chongqing University

Hello, dear friends!

First of all, thank you for your participation in this light walk in the old campus of Chongqing University. Please follow the route and read and complete the questionnaire under the guidance of the tour leader. When you are walking in the old campus of Chongqing University, please carefully observe and pay attention to the light sources, shadows and changes in the lightscape that give you a strong visual impression. When you walk through the lightscape in the old campus of Chongqing University, please carefully observe and pay attention to the light sources, light and shadow, and the lightscape formed by their changes that leave a strong visual impression. This questionnaire is for area B, which has a different experience of light and humanity.

## Basic Information

1. Your name \* [fill in the blank] \* \_\_\_\_\_
2. Your gender [Single choice question]\*  
☐ Male  
☐ Female
3. Your age \* [fill in the blank] \* \_\_\_\_\_
4. Your occupation or profession\* [fill in the blank] \* \_\_\_\_\_

## Subjective evaluation

1. Your lightscape spot (either one will do) [Single Choice] \*

|                                                                                                                                                              |                                                                                                                                           |                                                                                                                                                 |                                                                                                                                             |                                                                                                                                        |
|--------------------------------------------------------------------------------------------------------------------------------------------------------------|-------------------------------------------------------------------------------------------------------------------------------------------|-------------------------------------------------------------------------------------------------------------------------------------------------|---------------------------------------------------------------------------------------------------------------------------------------------|----------------------------------------------------------------------------------------------------------------------------------------|
| <br><input type="radio"/> B1 (Swimming Pool )                               | <br><input type="radio"/> B2 (Archives Corridor)         | <br><input type="radio"/> B3 (The square outside the Archives) | <br><input type="radio"/> B4 (the statue of Chairman Mao) | <br><input type="radio"/> B5 (the East Gate Square) |
| <br><input type="radio"/> B6 (the pond beside the Architecture Hall)        | <br><input type="radio"/> B7 (the Architecture Hall)     | <br><input type="radio"/> B8 (the Construction Hall)           | <br><input type="radio"/> B9 (Library Recreation Square)  | <br><input type="radio"/> B10 (Library Grand Steps) |
| <br><input type="radio"/> B11 (Connecting Corridor near Badminton Courtl) | <br><input type="radio"/> B12 (Second Student Canteen) | <br><input type="radio"/> B13 (Southwest Gate)               |                                                                                                                                             |                                                                                                                                        |

2. Please read the following adjectives carefully; to what extent do they, in fact, reflect your feelings about the overall experience of lightscapes at this test site? \* [matrix scale Question]

| Evaluation Dimensions                    | Semantic Terms               | 2<br>(e.g., Very Satisfied) | 1<br>(e.g., Satisfied) | 0<br>(e.g., Neutral) | -1<br>(e.g., Dissatisfied) | -2<br>(e.g., Very Dissatisfied) |
|------------------------------------------|------------------------------|-----------------------------|------------------------|----------------------|----------------------------|---------------------------------|
| 01 Quality of emotional perception       | Satisfactory—Dissatisfactory |                             |                        |                      |                            |                                 |
|                                          | Comfortable—Uncomfortable    |                             |                        |                      |                            |                                 |
|                                          | Pleasant—Worried             |                             |                        |                      |                            |                                 |
|                                          | Vibrant—Dull                 |                             |                        |                      |                            |                                 |
|                                          | Interesting—Boring           |                             |                        |                      |                            |                                 |
|                                          | Impressed—Unimpressed        |                             |                        |                      |                            |                                 |
|                                          | Satisfactory—Questionable    |                             |                        |                      |                            |                                 |
| 02 lightscapes Characteristic Perception | Bright—Dark                  |                             |                        |                      |                            |                                 |
|                                          | Blinding—Appropriate         |                             |                        |                      |                            |                                 |
|                                          | Uniformity—unevenness        |                             |                        |                      |                            |                                 |
|                                          | Direct—Indirect              |                             |                        |                      |                            |                                 |
|                                          | Warm—cool                    |                             |                        |                      |                            |                                 |
|                                          | Richness—homogeneity         |                             |                        |                      |                            |                                 |
|                                          | Dynamic—static               |                             |                        |                      |                            |                                 |

|                               |                                                   |
|-------------------------------|---------------------------------------------------|
|                               | Strongly rhythmic—weakly rhythmic                 |
|                               | Cultural connotations—no cultural connotations    |
|                               | Visible change—insignificant change               |
|                               | Aesthetically pleasing—not aesthetically pleasing |
| 03 Ambient Spatial Atmosphere | Coherent—disordered                               |
|                               | Orderly—disorderly                                |
|                               | Natural—artificial                                |
|                               | Traditional—Modern                                |
|                               | Visible change—insignificant change               |
| 04 Social Tendencies          | Social—Unsocial                                   |
|                               | Safe—Unsafe                                       |

3. Looking closely at the area, are there any lightscares that give you a pleasant, cosy or pleasing experience? Please select and rank 5 lightscares that are pleasant to you. [For the ranking question, please put the numbers in parentheses in order] \*

- ☐ the light of the sky and the shadows of the clouds
- ☐ Shadows of Buildings
- ☐ Sunset
- ☐ Plant Silhouette Skyline
- ☐ Building Silhouette Skyline
- ☐ Light Spots Between Leaves
- ☐ Lake Reflection
- ☐ Reflections of Building Roofs, Facades and Glasses
- ☐ Reflections of special materials such as the ground
- ☐ Shadow fall on mountain rock staircase
- ☐ Others

4. Looking closely at the area, are there any lightscares that give you an unpleasant, uncomfortable or upsetting experience? Please select and rank 5 lightscares that are unpleasant for you. [For ranking questions, please put the numbers in brackets]\*

- ☐ the light of the sky and the shadows of the clouds
- ☐ Shadows of Buildings
- ☐ Sunset
- ☐ Plant Silhouette Skyline
- ☐ Building Silhouette Skyline
- ☐ Light Spots Between Leaves
- ☐ Lake Reflection
- ☐ Reflections of Building Roofs, Facades and Glasses
- ☐ Reflections of special materials such as the ground
- ☐ Shadow fall on mountain rock staircase
- ☐ Others

5. To what extent do other environmental factors in the area influence your experience? (Please choose which value best indicates the extent to which it has influenced your experience?) [Matrix Scale Question] \*

|                                         | Very High<br>Impact<br>2 | Impact<br>1 | Fair<br>0 | No Impact<br>-1 | Very Low<br>Impact<br>-2 |
|-----------------------------------------|--------------------------|-------------|-----------|-----------------|--------------------------|
| 1. Temperature and humidity environment |                          |             |           |                 |                          |
| 2. Acoustic environment                 |                          |             |           |                 |                          |
| 3. Odour quality                        |                          |             |           |                 |                          |

4. Outdoor space scale and division method
5. Landscape arrangement such as greening and sketches.
6. Arrangement of service facilities

6. For sound (hearing), odour (taste, smell), material (touch), etc., can you specify what factors you perceive (e.g., the scent of flowers, birdsong, etc.), which have an impact on the perception of light? Please fill in the blanks after the options and write down your perception factors and perception situation. [Multiple Choice Questions] \*

- ☐ Hearing \_\_\_\_\_ \*
- ☐ Taste \_\_\_\_\_ \*
- ☐ Smell \_\_\_\_\_ \*
- ☐ Tactile \_\_\_\_\_ \*
- ☐ No effect

7. Do you have any other optimisation suggestions for the creation of this lightscape spot? Please give 1–2 optimisation suggestions for our later improvement. [Fill in the blank]

\* \_\_\_\_\_

### Supplementary Materials 3

#### Questionnaire S3. Nighttime lightscape walking survey in Campus A of Chongqing University

Hello, dear friends!

First of all, thank you for your participation in this lightscape walking in the old campus of Chongqing University. Please follow the route to experience the light walk under the guidance of the tour leader, and read and complete the questionnaire carefully. When you are walking in the old campus of Chongqing University, please carefully observe and pay attention to the surrounding light sources, light and shadow and their changes to form a strong visual impression, and fill in the questionnaire when you arrive at the designated area. This questionnaire is for area A, which is close to the Jialing River and has a different experience of light and humanity.

#### Basic Information

1. Your name \* [fill in the blank] \* \_\_\_\_\_
2. Your gender [Single choice question] \*  
☐ Male  
☐ Female
3. Your age \* [fill in the blank] \* \_\_\_\_\_
4. Your occupation or profession \* [fill in the blank] \* \_\_\_\_\_

#### Subjective evaluation

1. Your lightscape spot (either one will do) [Single Choice] \*

|                                                                                     |                                                                                     |                                                                                     |                                                                                      |                                                                                       |
|-------------------------------------------------------------------------------------|-------------------------------------------------------------------------------------|-------------------------------------------------------------------------------------|--------------------------------------------------------------------------------------|---------------------------------------------------------------------------------------|
|  |  |  |  |  |
| <input type="radio"/> A1 (ab passage)                                               | <input type="radio"/> A2 (five churches)                                            | <input type="radio"/> A3 (bell tower)                                               | <input type="radio"/> A4 (library)                                                   | <input type="radio"/> A5 (plaza outside the dormitory)                                |
|  |  |  |  |  |
| <input type="radio"/> A6 (Democracy Lake)                                           | <input type="radio"/> A7 (Public Administration)                                    | <input type="radio"/> A8 (Bishop's Building)                                        | <input type="radio"/> A9 (Literature Lounge)                                         | <input type="radio"/> A10 (College of Engineering)                                    |

2. Please read the following adjectives carefully; to what extent do they, in fact, reflect your feelings about the overall experience of lightscares at this test site? \* [matrix scale Question]

| Evaluation Dimensions                    | Semantic Terms                                      | 2<br>(e.g., Very Satisfied) | 1<br>(e.g., Satisfied) | 0<br>(e.g., Neutral) | -1<br>(e.g., Dissatisfied) | -2<br>(e.g., Very Dissatisfied) |
|------------------------------------------|-----------------------------------------------------|-----------------------------|------------------------|----------------------|----------------------------|---------------------------------|
| 01 Quality of emotional perception       | Satisfactory – Dissatisfactory                      |                             |                        |                      |                            |                                 |
|                                          | Comfortable – Uncomfortable                         |                             |                        |                      |                            |                                 |
|                                          | Pleasant – Worried                                  |                             |                        |                      |                            |                                 |
|                                          | Vibrant – Dull                                      |                             |                        |                      |                            |                                 |
|                                          | Interesting – Boring                                |                             |                        |                      |                            |                                 |
|                                          | Impressed – Unimpressed                             |                             |                        |                      |                            |                                 |
|                                          | Satisfactory – Questionable                         |                             |                        |                      |                            |                                 |
| 02 lightscares Characteristic Perception | Bright – Dark                                       |                             |                        |                      |                            |                                 |
|                                          | Blinding – Appropriate                              |                             |                        |                      |                            |                                 |
|                                          | Uniformity – unevenness                             |                             |                        |                      |                            |                                 |
|                                          | Direct – Indirect                                   |                             |                        |                      |                            |                                 |
|                                          | Warm – cool                                         |                             |                        |                      |                            |                                 |
|                                          | Richness – homogeneity                              |                             |                        |                      |                            |                                 |
|                                          | Dynamic – static                                    |                             |                        |                      |                            |                                 |
| 03 Ambient Spatial Atmosphere            | Strongly rhythmic – weakly rhythmic                 |                             |                        |                      |                            |                                 |
|                                          | Cultural connotations – no cultural connotations    |                             |                        |                      |                            |                                 |
|                                          | Visible change – insignificant change               |                             |                        |                      |                            |                                 |
|                                          | Aesthetically pleasing – not aesthetically pleasing |                             |                        |                      |                            |                                 |
|                                          | Coherent – disordered                               |                             |                        |                      |                            |                                 |
|                                          | Orderly – disorderly                                |                             |                        |                      |                            |                                 |
|                                          | Natural – artificial                                |                             |                        |                      |                            |                                 |
| 04 Social Tendencies                     | Traditional – Modern                                |                             |                        |                      |                            |                                 |
|                                          | Visible change – insignificant change               |                             |                        |                      |                            |                                 |
|                                          | Social – Unsocial                                   |                             |                        |                      |                            |                                 |
|                                          | Safe – Unsafe                                       |                             |                        |                      |                            |                                 |

3. Looking closely at the area, are there any lightscares that give you a pleasant, cosy or pleasing experience? Please select and rank 5 lightscares that are pleasant to you. [For the ranking question, please put the numbers in parentheses in order] \*

- ☐ Decorative lighting for landmark buildings
- ☐ Decorative lighting for green landscape, special structures
- ☐ Cloud shadow
- ☐ Shadow on plants and stones
- ☐ Shadows of buildings
- ☐ Light spots on leaves
- ☐ Lake Reflection
- ☐ Reflections on building roofs, facades and glass
- ☐ Reflections of special materials such as the ground
- ☐ Glass Reflection on Moving Vehicles
- ☐ Lights of moving vehicles

- ☐ Skyline of building outline
- ☐ Moonlight
- ☐ Others

4. Looking closely at the area, are there any lightscapes that give you an unpleasant, uncomfortable or upsetting experience? Please select and rank 5 lightscapes that are unpleasant for you. [For ranking questions, please put the numbers in brackets] \*

- ☐ Decorative lighting for landmark buildings
- ☐ Decorative lighting for green landscape, special structures
- ☐ Cloud shadow
- ☐ Shadow on plants and stones
- ☐ Shadows of buildings
- ☐ Light spots on leaves
- ☐ Lake Reflection
- ☐ Reflections on building roofs, facades and glass
- ☐ Reflections of special materials such as the ground
- ☐ Glass Reflection on Moving Vehicles
- ☐ Lights of moving vehicles
- ☐ Skyline of building outline
- ☐ Moonlight
- ☐ Others

5. To what extent do other environmental factors in the area influence your experience? (Please choose which value best indicates the extent to which it has influenced your experience?) [Matrix Scale Question] \*

|                                                         | Very High<br>Impact<br>2 | Impact<br>1 | Fair<br>0 | No Impact<br>-1 | Very Low<br>Impact<br>-2 |
|---------------------------------------------------------|--------------------------|-------------|-----------|-----------------|--------------------------|
| 1. Temperature and humidity environment                 |                          |             |           |                 |                          |
| 2. Acoustic environment                                 |                          |             |           |                 |                          |
| 3. Odour quality                                        |                          |             |           |                 |                          |
| 4. Outdoor space scale and division method              |                          |             |           |                 |                          |
| 5. Landscape arrangement such as greening and sketches. |                          |             |           |                 |                          |
| 6. Arrangement of service facilities                    |                          |             |           |                 |                          |

6. For sound (hearing), odour (taste, smell), material (touch), etc., can you specify what factors you perceive (e.g., the scent of flowers, birdsong, etc.), which have an impact on the perception of light? Please fill in the blanks after the options and write down your perception factors and perception situation. [Multiple Choice Questions] \*

- ☐ Hearing \_\_\_\_\_ \*
- ☐ Taste \_\_\_\_\_ \*
- ☐ Smell \_\_\_\_\_ \*
- ☐ Tactile \_\_\_\_\_ \*
- ☐ No effect

7. Do you have any other optimisation suggestions for the creation of this lightscape spot? Please give 1–2 optimisation suggestions for our later improvement. [Fill in the blank] \*

#### *Supplementary Materials 4*

**Questionnaire S4.** Nighttime lightscape walking survey in Campus B of Chongqing University



Hello, dear friends!

First of all, thank you for your participation in this light walk in the old campus of Chongqing University. Please follow the route and read and complete the questionnaire under the guidance of the tour leader. When you are walking in the old campus of Chongqing University, please carefully observe and pay attention to the light sources, shadows and changes in the lightscape that give you a strong visual impression. When you walk through the lightscape in the old campus of Chongqing University, please carefully observe and pay attention to the light sources, light and shadow, and the lightscape formed by their changes that leave a strong visual impression. This questionnaire is for area B, which has a different experience of light and humanity.

### Basic Information

1. Your name \* [fill in the blank] \* \_\_\_\_\_
2. Your gender [Single choice question] \*  
☐ Male  
☐ Female
3. Your age \* [fill in the blank] \* \_\_\_\_\_
4. Your occupation or profession \* [fill in the blank] \* \_\_\_\_\_

### Subjective evaluation

1. Your lightscape spot (either one will do) [Single Choice] \*

|                                                                                                                                          |                                                                                                                       |                                                                                                                              |                                                                                                                          |                                                                                                                      |
|------------------------------------------------------------------------------------------------------------------------------------------|-----------------------------------------------------------------------------------------------------------------------|------------------------------------------------------------------------------------------------------------------------------|--------------------------------------------------------------------------------------------------------------------------|----------------------------------------------------------------------------------------------------------------------|
| <br>○ B1 (Swimming Pool)                               | <br>○ B2 (Archives Corridor)        | <br>○ B3 (The square outside the Archives) | <br>○ B4 (the statue of Chairman Mao) | <br>○ B5 (the East Gate Square)  |
| <br>○ B6 (the pond beside the Architecture Hall)      | <br>○ B7 (the Architecture Hall)   | <br>○ B8 (the Construction Hall)          | <br>○ B9 (Library Recreation Square) | <br>○ B10 (Library Grand Steps) |
| <br>○ B11 (Connecting Corridor near Badminton Courtl) | <br>○ B12 (Second Student Canteen) | <br>○ B13 (Southwest Gate)                |                                                                                                                          |                                                                                                                      |

2. Please read the following adjectives carefully; to what extent do they, in fact, reflect your feelings about the overall experience of lightscapes at this test site? \* [matrix scale Question]

| Evaluation Dimensions              | Semantic Terms     | 2<br>(e.g., Very Satisfied) | 1<br>(e.g., Satisfied) | 0<br>(e.g., Neutral) | -1<br>(e.g., Dissatisfied) | -2<br>(e.g., Very Dissatisfied) |
|------------------------------------|--------------------|-----------------------------|------------------------|----------------------|----------------------------|---------------------------------|
| 01 Quality of emotional perception | Satisfactory—      |                             |                        |                      |                            |                                 |
|                                    | Dissatisfactory    |                             |                        |                      |                            |                                 |
|                                    | Comfortable—       |                             |                        |                      |                            |                                 |
|                                    | Uncomfortable      |                             |                        |                      |                            |                                 |
|                                    | Pleasant—Worried   |                             |                        |                      |                            |                                 |
|                                    | Vibrant—Dull       |                             |                        |                      |                            |                                 |
|                                    | Interesting—Boring |                             |                        |                      |                            |                                 |

---

|                      |                            |
|----------------------|----------------------------|
|                      | Impressed — Unimpressed    |
|                      | Satisfactory —             |
|                      | Questionable               |
|                      | Bright — Dark              |
|                      | Blinding — Appropriate     |
|                      | Uniformity — unevenness    |
|                      | Direct — Indirect          |
| 02 lightscares       | Warm — cool                |
| Characteristic       | Richness — homogeneity     |
| Perception           | Dynamic — static           |
|                      | Strongly rhythmic —        |
|                      | weakly rhythmic            |
|                      | Cultural connotations — no |
|                      | cultural connotations      |
|                      | Visible change —           |
|                      | insignificant change       |
|                      | Aesthetically pleasing —   |
|                      | not aesthetically pleasing |
| 03 Ambient Spatial   | Coherent — disordered      |
| Atmosphere           | Orderly — disorderly       |
|                      | Natural — artificial       |
|                      | Traditional — Modern       |
|                      | Visible change —           |
|                      | insignificant change       |
| 04 Social Tendencies | Social — Unsocial          |
|                      | Safe — Unsafe              |

---

3. Looking closely at the area, are there any lightscares that give you a pleasant, cosy or pleasing experience? Please select and rank 5 lightscares that are pleasant to you. [For the ranking question, please put the numbers in parentheses in order] \*

- ☐ Decorative lighting for landmark buildings
- ☐ Decorative lighting for green landscape, special structures
- ☐ Cloud shadow
- ☐ Shadow on plants and stones
- ☐ Shadows of buildings
- ☐ Light spots on leaves
- ☐ Lake Reflection
- ☐ Reflections on building roofs, facades and glass
- ☐ Reflections of special materials such as the ground
- ☐ Glass Reflection on Moving Vehicles
- ☐ Lights of moving vehicles
- ☐ Skyline of building outline
- ☐ Moonlight
- ☐ Others

4. Looking closely at the area, are there any lightscares that give you an unpleasant, uncomfortable or upsetting experience? Please select and rank 5 lightscares that are unpleasant for you. [For ranking questions, please put the numbers in brackets] \*

- ☐ Decorative lighting for landmark buildings
- ☐ Decorative lighting for green landscape, special structures
- ☐ Cloud shadow
- ☐ Shadow on plants and stones
- ☐ Shadows of buildings
- ☐ Light spots on leaves
- ☐ Lake Reflection

- ☐ Reflections on building roofs, facades and glass
- ☐ Reflections of special materials such as the ground
- ☐ Glass Reflection on Moving Vehicles
- ☐ Lights of moving vehicles
- ☐ Skyline of building outline
- ☐ Moonlight
- ☐ Others

5. To what extent do other environmental factors in the area influence your experience? (Please choose which value best indicates the extent to which it has influenced your experience?) [Matrix Scale Question] \*

|                                                         | Very High<br>Impact<br>2 | Impact<br>1 | Fair<br>0 | No Impact<br>-1 | Very Low<br>Impact<br>-2 |
|---------------------------------------------------------|--------------------------|-------------|-----------|-----------------|--------------------------|
| 1. Temperature and humidity environment                 |                          |             |           |                 |                          |
| 2. Acoustic environment                                 |                          |             |           |                 |                          |
| 3. Odour quality                                        |                          |             |           |                 |                          |
| 4. Outdoor space scale and division method              |                          |             |           |                 |                          |
| 5. Landscape arrangement such as greening and sketches. |                          |             |           |                 |                          |
| 6. Arrangement of service facilities                    |                          |             |           |                 |                          |

6. For sound (hearing), odour (taste, smell), material (touch), etc., can you specify what factors you perceive (e.g., the scent of flowers, birdsong, etc.), which have an impact on the perception of light? Please fill in the blanks after the options and write down your perception factors and perception situation. [Multiple Choice Questions] \*

- ☐ Hearing \_\_\_\_\_ \*
- ☐ Taste \_\_\_\_\_ \*
- ☐ Smell \_\_\_\_\_ \*
- ☐ Tactile \_\_\_\_\_ \*
- ☐ No effect

7. Do you have any other optimisation suggestions for the creation of this lightscape spot? Please give 1–2 optimisation suggestions for our later improvement. [Fill in the blank] \*

#### Supplementary Materials 5

**Table S1.** Parameter information for the EVERFINE SRC-2 Colour Spectral Luminance Meter.

| Indicator Name                                            | Indicator Information                                                                                                  |
|-----------------------------------------------------------|------------------------------------------------------------------------------------------------------------------------|
| Wavelength range                                          | 380~780 nm                                                                                                             |
| Wavelength accuracy                                       | 0.5 nm                                                                                                                 |
| Luminance accuracy                                        | 4% reading + 1 word                                                                                                    |
| Chromaticity standard accuracy                            | 0.003 (under standard A light source)                                                                                  |
| Measuring luminance range (under standard A light source) | 0.1 cd/m <sup>2</sup> ~20 kcd/m <sup>2</sup> or 10 cd/m <sup>2</sup> ~2000 kcd/m <sup>2</sup> (according to the order) |
| Minimum measuring distance                                | 1 m—infinity                                                                                                           |
| Communication interface                                   | Type C                                                                                                                 |
| Power supply mode                                         | lithium battery/power adapter                                                                                          |
| Overall dimension and weight                              | 180 mm × 80 mm × 62 mm, 560 g                                                                                          |

Supplementary Materials 6

**Table S2.** Composite scorecard of typical daytime lightscapes favoritism in campus A.

| Options                                               | Combined Score | 1st         | 2nd         | 3rd         | 4th         | 5th         | Subtotal |
|-------------------------------------------------------|----------------|-------------|-------------|-------------|-------------|-------------|----------|
| 1. Sky light and clouds                               | 8.1            | 45 (31.47%) | 23 (16.08%) | 30 (20.98%) | 26 (18.18%) | 19 (13.29%) | 143      |
| 4. Plant silhouette skyline                           | 6.95           | 23 (18.25%) | 30 (23.81%) | 29 (23.02%) | 24 (19.05%) | 20 (15.87%) | 126      |
| 6. Light spots between Leaves                         | 6.59           | 26 (21.85%) | 24 (20.17%) | 31 (26.05%) | 17 (14.29%) | 21 (17.65%) | 119      |
| 5. Building silhouette skyline                        | 6.16           | 22 (19.3%)  | 23 (20.18%) | 19 (16.67%) | 23 (20.18%) | 27 (23.68%) | 114      |
| 2. Building Shadows                                   | 6.15           | 32 (29.36%) | 24 (22.02%) | 18 (16.51%) | 16 (14.68%) | 19 (17.43%) | 109      |
| 3. Sunset                                             | 3.67           | 3 (4.35%)   | 24 (34.78%) | 15 (21.74%) | 9 (13.04%)  | 18 (26.09%) | 69       |
| 8. Reflections from building roofs, facades and glass | 2.78           | 5 (9.43%)   | 7 (13.21%)  | 14 (26.42%) | 18 (33.96%) | 9 (16.98%)  | 53       |
| 9. Ground and other special materials reflections     | 1.82           | 1 (2.7%)    | 5 (13.51%)  | 6 (16.22%)  | 11 (29.73%) | 14 (37.84%) | 37       |
| 7. Lake reflections                                   | 1.42           | 7 (26.92%)  | 3 (11.54%)  | 2 (7.69%)   | 12 (46.15%) | 2 (7.69%)   | 26       |
| 10. The falling shadow on the mountain rock staircase | 0.91           | 0 (0%)      | 2 (10.53%)  | 1 (5.26%)   | 9 (47.37%)  | 7 (36.84%)  | 19       |
| 11. Other                                             | 0.45           | 1 (10%)     | 0 (0%)      | 0 (0%)      | 0 (0%)      | 9 (90%)     | 10       |

Supplementary Materials 7

**Table S3.** Composite scorecard of typical daytime lightscapes favouritism in campus B.

| Options                                                  | Combined Score | 1st         | 2nd         | 3rd         | 4th         | 5th         | Subtotal |
|----------------------------------------------------------|----------------|-------------|-------------|-------------|-------------|-------------|----------|
| 1. Sky light and clouds                                  | 8.18           | 63 (34.24%) | 21 (11.41%) | 45 (24.46%) | 34 (18.48%) | 21 (11.41%) | 184      |
| 4. Plant silhouette skyline                              | 7.86           | 35 (19.34%) | 52 (28.73%) | 31 (17.13%) | 33 (18.23%) | 30 (16.57%) | 181      |
| 6. Light spots between leaves                            | 7.35           | 43 (25.44%) | 23 (13.61%) | 49 (28.99%) | 28 (16.57%) | 26 (15.38%) | 169      |
| 5. Building silhouette skyline                           | 6              | 24 (16.9%)  | 27 (19.01%) | 32 (22.54%) | 30 (21.13%) | 29 (20.42%) | 142      |
| 2. Building Shadows                                      | 5.85           | 24 (17.39%) | 39 (28.26%) | 15 (10.87%) | 26 (18.84%) | 34 (24.64%) | 138      |
| 3. Sunset                                                | 3.44           | 5 (6.25%)   | 32 (40%)    | 21 (26.25%) | 8 (10%)     | 14 (17.5%)  | 80       |
| 7. Lake reflection                                       | 2.19           | 10 (19.61%) | 11 (21.57%) | 6 (11.76%)  | 20 (39.22%) | 4 (7.84%)   | 51       |
| 8. Reflections on building roofs, facades and glasses    | 1.65           | 2 (4.65%)   | 5 (11.63%)  | 5 (11.63%)  | 14 (32.56%) | 17 (39.53%) | 43       |
| 9. Reflections on the ground and other special materials | 1.17           | 1 (3.13%)   | 0 (0%)      | 3 (9.38%)   | 12 (37.5%)  | 16 (50%)    | 32       |
| 10. Rock staircase on the falling shadow                 | 0.88           | 2 (8.7%)    | 1 (4.35%)   | 4 (17.39%)  | 5 (21.74%)  | 11 (47.83%) | 23       |
| 11. Other                                                | 0.44           | 2 (16.67%)  | 0 (0%)      | 0 (0%)      | 1 (8.33%)   | 9 (75%)     | 12       |

Supplementary Materials 8

**Table S4.** Composite scorecard of typical nighttime lightscapes favoritism in campus A.

| Options | Combined Score | 1st | 2nd | 3rd | 4th | 5th | Subtotal |
|---------|----------------|-----|-----|-----|-----|-----|----------|
|---------|----------------|-----|-----|-----|-----|-----|----------|

|                                                                   |      |             |             |             |             |             |     |
|-------------------------------------------------------------------|------|-------------|-------------|-------------|-------------|-------------|-----|
| 1. Decorative lighting for landmark buildings                     | 8.81 | 86 (74.78%) | 14 (12.17%) | 4 (3.48%)   | 6 (5.22%)   | 5 (4.35%)   | 115 |
| 2. Decorative lighting for green landscape and special structures | 7.38 | 22 (21.57%) | 55 (53.92%) | 8 (7.84%)   | 9 (8.82%)   | 8 (7.84%)   | 102 |
| 3. Cloud shadow                                                   | 7.14 | 26 (25.74%) | 24 (23.76%) | 28 (27.72%) | 14 (13.86%) | 9 (8.91%)   | 101 |
| 13. Moonlight                                                     | 7.07 | 14 (12.96%) | 20 (18.52%) | 16 (14.81%) | 16 (14.81%) | 42 (38.89%) | 108 |
| 6. Light spots of leaves                                          | 6.72 | 6 (5.88%)   | 14 (13.73%) | 31 (30.39%) | 34 (33.33%) | 17 (16.67%) | 102 |
| 5. Shadow of buildings                                            | 5.57 | 6 (7.23%)   | 21 (25.3%)  | 20 (24.1%)  | 24 (28.92%) | 12 (14.46%) | 83  |
| 4. Shadows on plants, stones                                      | 5.34 | 6 (7.5%)    | 15 (18.75%) | 26 (32.5%)  | 19 (23.75%) | 14 (17.5%)  | 80  |
| 12. Skyline of building silhouettes                               | 3.08 | 2 (4.08%)   | 3 (6.12%)   | 10 (20.41%) | 15 (30.61%) | 19 (38.78%) | 49  |
| 8. Reflections on building roofs, facades and glass               | 2.89 | 2 (4.44%)   | 3 (6.67%)   | 10 (22.22%) | 21 (46.67%) | 9 (20%)     | 45  |
| 14. Others                                                        | 1.8  | 3 (10.71%)  | 3 (10.71%)  | 6 (21.43%)  | 3 (10.71%)  | 13 (46.43%) | 28  |
| 9. Reflections on the ground and other special materials          | 1.69 | 2 (7.69%)   | 2 (7.69%)   | 9 (34.62%)  | 6 (23.08%)  | 7 (26.92%)  | 26  |
| 11. Lights of moving vehicles                                     | 1.53 | 0 (0%)      | 1 (10%)     | 1 (10%)     | 4 (40%)     | 4 (40%)     | 10  |
| 7. Reflection of lake water                                       | 0.62 | 0 (0%)      | 1 (4%)      | 6 (24%)     | 4 (16%)     | 14 (56%)    | 25  |
| 10. Reflection of glass on moving vehicles                        | 0.38 | 1 (16.67%)  | 0 (0%)      | 1 (16.67%)  | 1 (16.67%)  | 3 (50%)     | 6   |

*Supplementary Materials 9*

**Table S5.** Composite scorecard of typical nighttime lightscape favoritism in campus B.

| Options                                                       | Combined Score | 1st         | 2nd         | 3rd         | 4th         | 5th         | Subtotal |
|---------------------------------------------------------------|----------------|-------------|-------------|-------------|-------------|-------------|----------|
| 6. Light spot on leaf                                         | 8.19           | 20 (12.2%)  | 23 (14.02%) | 49 (29.88%) | 45 (27.44%) | 27 (16.46%) | 164      |
| 3. Cloud shadow                                               | 7.58           | 43 (30.28%) | 36 (25.35%) | 37 (26.06%) | 15 (10.56%) | 11 (7.75%)  | 142      |
| 2. Decorative lighting of green landscape, special structures | 7.29           | 36 (26.67%) | 59 (43.7%)  | 20 (14.81%) | 9 (6.67%)   | 11 (8.15%)  | 135      |
| 4. Shadows on plants and stones                               | 6.72           | 14 (10.29%) | 24 (17.65%) | 29 (21.32%) | 39 (28.68%) | 30 (22.06%) | 136      |
| 13. Moonlight                                                 | 6.72           | 23 (17.04%) | 22 (16.3%)  | 25 (18.52%) | 27 (20%)    | 38 (28.15%) | 135      |
| 1. Decorative lighting of iconic buildings                    | 6.68           | 74 (61.67%) | 18 (15%)    | 6 (5%)      | 14 (11.67%) | 8 (6.67%)   | 120      |
| 5. Shadows on buildings                                       | 5.72           | 10 (8.7%)   | 26 (22.61%) | 25 (21.74%) | 33 (28.7%)  | 21 (18.26%) | 115      |
| 12. Skyline of building outline                               | 2.88           | 5 (8.2%)    | 4 (6.56%)   | 11 (18.03%) | 15 (24.59%) | 26 (42.62%) | 61       |
| 7. Lake reflections                                           | 2.46           | 7 (14%)     | 8 (16%)     | 9 (18%)     | 10 (20%)    | 16 (32%)    | 50       |
| 8. Building roof, facade and glass reflections                | 2.31           | 1 (2.04%)   | 5 (10.2%)   | 9 (18.37%)  | 19 (38.78%) | 15 (30.61%) | 49       |
| 14. Other                                                     | 1.33           | 0 (0%)      | 5 (17.86%)  | 9 (32.14%)  | 0 (0%)      | 14 (50%)    | 28       |
| 10. Reflection of glass on moving vehicles                    | 1.26           | 3 (11.11%)  | 1 (3.7%)    | 2 (7.41%)   | 8 (29.63%)  | 13 (48.15%) | 27       |
| 11. Lights of moving vehicles                                 | 0.73           | 0 (0%)      | 4 (26.67%)  | 4 (26.67%)  | 2 (13.33%)  | 5 (33.33%)  | 15       |
| 9. Reflections of special materials such as the ground        | 0.15           | 0 (0%)      | 1 (33.33%)  | 1 (33.33%)  | 0 (0%)      | 1 (33.33%)  | 3        |

*Supplementary Materials 10*

**Table S6.** Record of daytime lightscape walking luminance data in area A.

| Location of Lightscares          | Schematic Diagram of Lightscares                                                    | Luminance of the Test Point L<br>(cd/m <sup>2</sup> ) |         |        |        | Average<br>Luminance<br>L (cd/m <sup>2</sup> ) |
|----------------------------------|-------------------------------------------------------------------------------------|-------------------------------------------------------|---------|--------|--------|------------------------------------------------|
|                                  |                                                                                     | A                                                     | B       | C      | D      |                                                |
| A1 (AB Passage)                  |    | 208.87                                                | 650.89  | 110.22 | 166.53 | 248.13                                         |
| A2 (Five Churches)               |    | 274.83                                                | 254.86  | 86.65  | 105.29 | 180.41                                         |
| A3 (Bell Tower)                  |   | 628.14                                                | 561.18  | 345.86 | 154.59 | 422.44                                         |
| A4 (Library)                     |  | 814.10                                                | 1427.28 | 968.48 | 997.83 | 1051.92                                        |
| A5 (Plaza outside the dormitory) |  | 190.96                                                | 233.88  | 248.02 | 126.54 | 199.85                                         |
| A6 (Democracy Lake)              |  | 594.50                                                | 538.36  | 333.32 | 423.95 | 474.78                                         |

|                              |                                                                                     |        |        |        |        |        |
|------------------------------|-------------------------------------------------------------------------------------|--------|--------|--------|--------|--------|
| A7 (Public Administration)   |    | 417.31 | 213.13 | 181.74 | 465.06 | 319.31 |
| A8 (Bishop's Building)       |    | 743.95 | 618.92 | 566.69 | 696.36 | 656.48 |
| A9 (Literature Lounge)       |   | 591.05 | 594.07 | 304.35 | 266.42 | 438.97 |
| A10 (College of Engineering) |  | 79.10  | 177.15 | 83.49  | 74.34  | 103.52 |

---



Supplementary Materials 11

Table S7. Record of daytime lightscape walking luminance data in area B.

| Location of Lightscares                    | Schematic Diagram of Lightscares                                                    | Luminance of the Test Point L<br>(cd/m) |        |        |        | Average<br>Luminance<br>L (cd/m) |
|--------------------------------------------|-------------------------------------------------------------------------------------|-----------------------------------------|--------|--------|--------|----------------------------------|
|                                            |                                                                                     | A                                       | B      | C      | D      |                                  |
| B1 (Swimming Pool)                         |    | 830.78                                  | 473.39 | 866.67 | 869.53 | 760.09                           |
| B2 (Archives Corridor)                     |    | 45.75                                   | 35.93  | 41.64  | 52.23  | 43.89                            |
| B3 (The square outside the Archives)       |   | 342.23                                  | 663.37 | 233.03 | 639.68 | 469.58                           |
| B4 (the statue of Chairman Mao)            |  | 118.27                                  | 250.73 | 306.12 | 543.72 | 304.71                           |
| B5 (the East Gate Square)                  |  | 736.5                                   | 621.2  | 559.57 | 687.90 | 661.29                           |
| B6 (the pond beside the Architecture Hall) |  | 79.96                                   | 225.41 | 229.04 | 83.53  | 154.48                           |



B7 (the Architecture Hall)

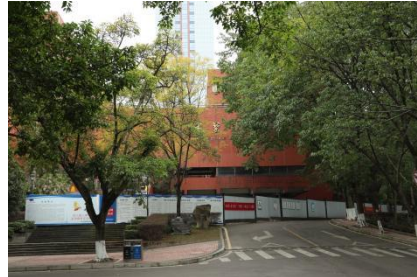

377.28    131.09    67.30    231.27    201.74

B8 (the Construction Hall)

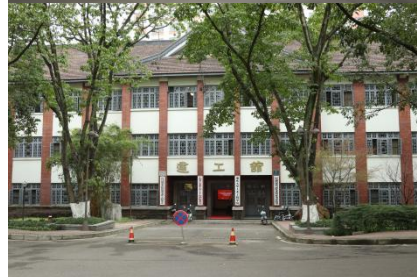

126.56    126.06    83.06    104.75    110.11

B9 (Library Recreation  
Square)

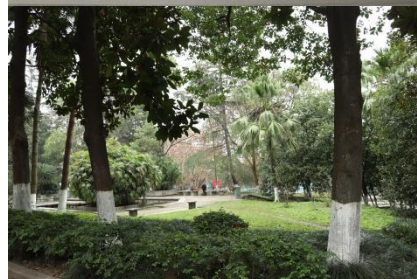

102.00    115.32    210.63    114.56    135.63

B10 (Library Grand Steps)

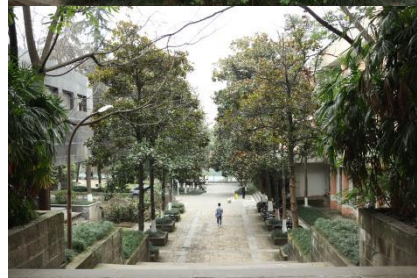

85.20    52.06    36.47    41.25    53.75

B11 (Connecting Corridor  
near Badminton Court)

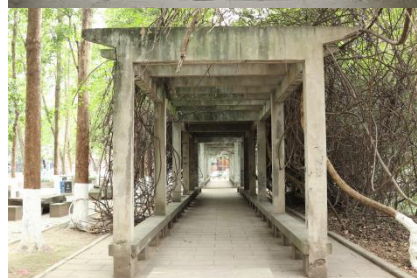

16.32    11.56    16.58    15.39    14.96

B12 (Second Student  
Canteen)

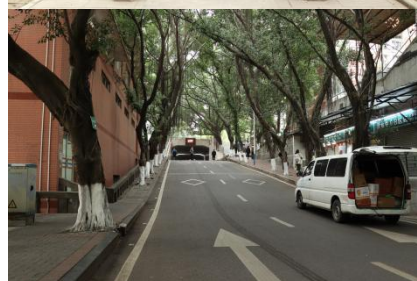

23.31    18.44    12.82    11.43    16.5

B13 (Southwest Gate)

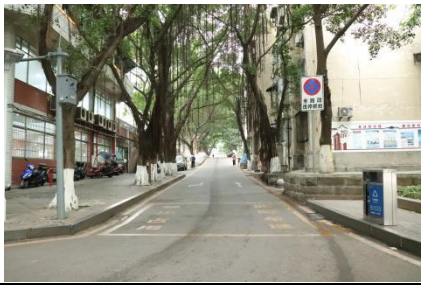

24.61    25.34    18.95    26.23    23.78

Supplementary Materials 12

Table S8. Record of nighttime lightscape walking luminance data in area A.

| Location of Lightscapes | Schematic Diagram of Lightscapes                                                    | Luminance of the Test Point L (cd/m) |       |       |      | Average Luminance L (cd/m) |
|-------------------------|-------------------------------------------------------------------------------------|--------------------------------------|-------|-------|------|----------------------------|
|                         |                                                                                     | A                                    | B     | C     | D    |                            |
| A1 (ab passage)         |    | 11.6                                 | 9.88  | 14.45 | 13.8 | 12.43                      |
|                         |  |                                      |       |       |      |                            |
| A2 (five churches)      |  | 9.96                                 | 13.68 | 9.44  | 7.85 | 10.23                      |
| A3 (bell towe)          |  | 6.04                                 | 8.23  | 7.29  | 7.72 | 7.32                       |

|                                  |                                                                                     |      |      |      |      |      |
|----------------------------------|-------------------------------------------------------------------------------------|------|------|------|------|------|
| A4 (library)                     |    | 7.59 | 7.16 | 7.85 | 6.03 | 7.16 |
| A5 (plaza outside the dormitory) |    | 5.38 | 7.78 | 9.52 | 7.60 | 7.57 |
| A6 (Democracy Lake)              |   | 8.27 | 9.05 | 8.23 | 7.33 | 8.22 |
| A7 (Public Administration)       |  | 5.32 | 6.27 | 6.36 | 5.58 | 5.88 |
| A8 (Bishop's Building)           |  | 8.54 | 8.78 | 8.17 | 5.21 | 7.68 |
| A9 (Literature Lounge)           |  | 8.12 | 8.75 | 8.96 | 5.78 | 7.90 |

|                              |                                                                                   |      |      |      |      |      |
|------------------------------|-----------------------------------------------------------------------------------|------|------|------|------|------|
| A10 (College of Engineering) |  | 4.26 | 4.90 | 6.08 | 6.94 | 5.55 |
|------------------------------|-----------------------------------------------------------------------------------|------|------|------|------|------|

Supplementary Materials 13

Table S9. Record of nighttime lightscape walking luminance data in area B.

| Location of Lightscares              | Schematic Diagram of Lightscares                                                    | Luminance of the Test Point L (cd/m) |      |      |       | Average Luminance L (cd/m) |
|--------------------------------------|-------------------------------------------------------------------------------------|--------------------------------------|------|------|-------|----------------------------|
|                                      |                                                                                     | A                                    | B    | C    | D     |                            |
| B1 (Swimming Pool)                   |   | 4.34                                 | 4.89 | 6.07 | 6.75  | 5.51                       |
| B2 (Archives Corridor)               |  | 4.75                                 | 5.44 | 7.12 | 5.35  | 5.67                       |
| B3 (The square outside the Archives) |  | 7.22                                 | 6.84 | 6.4  | 13.88 | 8.59                       |
| B4 (the statue of Chairman Mao)      |  | 7.07                                 | 7.65 | 7.54 | 9.63  | 7.97                       |



|                                            |                                                                                     |      |       |      |      |      |
|--------------------------------------------|-------------------------------------------------------------------------------------|------|-------|------|------|------|
| B5 (the East Gate Square)                  |    | 6.48 | 7.32  | 4.81 | 7.47 | 5.53 |
| B6 (the pond beside the Architecture Hall) |    | 6.54 | 5.74  | 3.80 | 6.05 | 5.56 |
| B7 (the Architecture Hall)                 |   | 5.51 | 7.35  | 7.18 | 6.89 | 6.73 |
| B8 (the Construction Hall)                 |  | 9.31 | 13.69 | 6.46 | 7.93 | 4.84 |
| B9 (Library Recreation Square)             |  | 4.42 | 4.53  | 3.8  | 6.59 | 4.84 |
| B10 (Library Grand Steps)                  |  | 5.51 | 5.75  | 8.74 | 7.82 | 6.96 |

B11 (Connecting Corridor near  
Badminton Court)

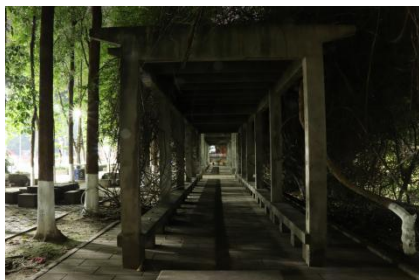

5.39    6.17    7.32    6.36    6.31

B12 (Second Student Canteen)

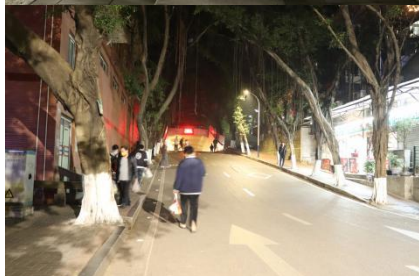

8.63    9.95    7.40    8.32    8.58

B13 (Southwest Gate)

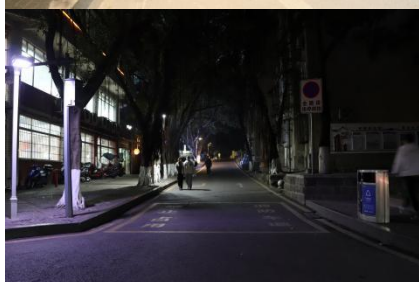

6.44    5.33    6.32    10.89    7.25
